# Supplementary material for: The Pro-Tumorigenic Role of Chemotherapy-Induced Extracellular HSP70 from Breast Cancer Cells via Intratumoral Macrophages
Source: MDPI journal article supplement (doi:10.3390/cancers15061903), 2023-03-22
Supplement: s1 [file s1]

**Supplementary Table S1. Information on the antibody used in this study.**

| Application    | Target         | Antibody***                       | Company           | Dilution | Antigen retrieval for IHC<br>(buffer pH) |
|----------------|----------------|-----------------------------------|-------------------|----------|------------------------------------------|
| Neutralization | HSP70          | Mouse monoclonal<br>(W27)         | Santa Cruz        | 1:40     | -                                        |
|                | HSP70          | Mouse monoclonal<br>(W27)         | Santa Cruz        | 1:2000   | -                                        |
| WB             | CD63           | Mouse monoclonal<br>(3-13)        | Wako              | 1:4000   | -                                        |
|                | TGF- $\beta$   | Rabbit polyclonal<br>(GTX130023)  | GeneTex           | 1:1000   | -                                        |
|                | $\beta$ -actin | Mouse monoclonal                  | SIGMA-<br>ALDRICH | 1:50000  | -                                        |
| ICC/IF         | HSP70          | Mouse monoclonal<br>(W27)         | Santa Cruz        | 1:400    | -                                        |
|                | HSP70          | Mouse monoclonal<br>(W27)         | Santa Cruz        | 1:400    | AC<br>pH9****                            |
|                | CD163          | Mouse monoclonal<br>(NCL-L-CD163) | Leica             | 1:200    | AC<br>pH9****                            |
| IHC            | Ki67           | Mouse monoclonal<br>(MIB1)        | DAKO              | 1:100    | AC<br>pH6 (Citrate buffer)               |
|                | ER*            | Rabbit monoclonal<br>(SP1)        | Roche             | -        | NA                                       |
|                | PR*            | Rabbit monoclonal<br>(1E2)        | Roche             | -        | NA                                       |
|                | HER2**         | HercepTest<br>-                   | DAKO              | -        | Water bath<br>(Product component)        |

AC; autoclave, ER; estrogen receptor, HER2; human epidermal growth factor receptor 2, HSP70; heat shock protein 70, ICC/IF; immunocytochemistry/immunofluorescence, IHC; immunohistochemistry, NA; not applicable, PR; progesterone receptor, TGF- $\beta$ ; transforming growth factor beta, WB; western blotting

\*; Immunohistochemistry for ER and PR was carried out using Ventana Benchmark XT system. \*\*; Immunohistochemistry for HER2 was carried out using Herceptest (DAKO). \*\*\*; Clone number or catalog number were given for monoclonal antibody and polyclonal antibody, respectively. \*\*\*\*; Buffer solution was purchased from Nichirei Bio.



**Supplementary Table S2. Sequences of the siRNA oligonucleotides and primers used in this study.**

| Target                           | Application   | Sequences                                                                      |
|----------------------------------|---------------|--------------------------------------------------------------------------------|
| <i>HSPA1A</i> ,<br><i>HSPA1B</i> | siHSP70#1     | Sense: 5'-CGACGGAGACAAGCCCAAG-3'<br>Antisense: 5'-CUUGGGCUUGUCUCCGUCG-3'       |
| <i>HSPA1A</i> ,<br><i>HSPA1B</i> | siHSP70#2     | Sense: 5'-CCAUGACGAAAGACAACAA-3'<br>Antisense: 5'-UUGUUGUCUUUCGUCAUGG-3'       |
| <i>CD163</i>                     | Real time PCR | Forward: 5'-CGGCTGCCTCCACCTCTAAGT-3'<br>Reverse: 5'-ATGAAGATGCTGGCGTGACA-3'    |
| <i>TGFBI</i>                     | Real time PCR | Forward: 5'-AGCGACTCGCCAGAGTGGTTA-3'<br>Reverse: 5'-GCAGTGTGTTATCCCTGCTGTCA-3' |
| <i>IL10</i>                      | Real time PCR | Forward: 5'-ATCAAGGCGCATGTGAAC-3'<br>Reverse: 5'-CAGGGAAGAAATCGATGACAG-3'      |
| <i>MMP2</i>                      | Real time PCR | Forward: 5'-ATAACCTGGATGCCGTCGTG-3'<br>Reverse: 5'-AGCCTAGCCAGTCGGATTTG-3'     |
| <i>RPL13A</i>                    | Real time PCR | Forward: 5'-CCTGGAGGAGAAGAGGAAAG-3'<br>Reverse: 5'-TTGAGGACCTCTGTGTATTT-3'     |

*HSPA1*; heat shock protein family A member 1, *IL10*; interleukin 10, *MMP2*; matrix metalloproteinase-2, *RPL13A*; ribosomal protein L13A, *TGFBI*; transforming growth factor beta 1
