# Supplementary material for: The Pro-Tumorigenic Role of Chemotherapy-Induced Extracellular HSP70 from Breast Cancer Cells via Intratumoral Macrophages
Source: MDPI journal article supplement (doi:10.3390/cancers15061903), 2023-03-22
Supplement: s1 [file s1]

A

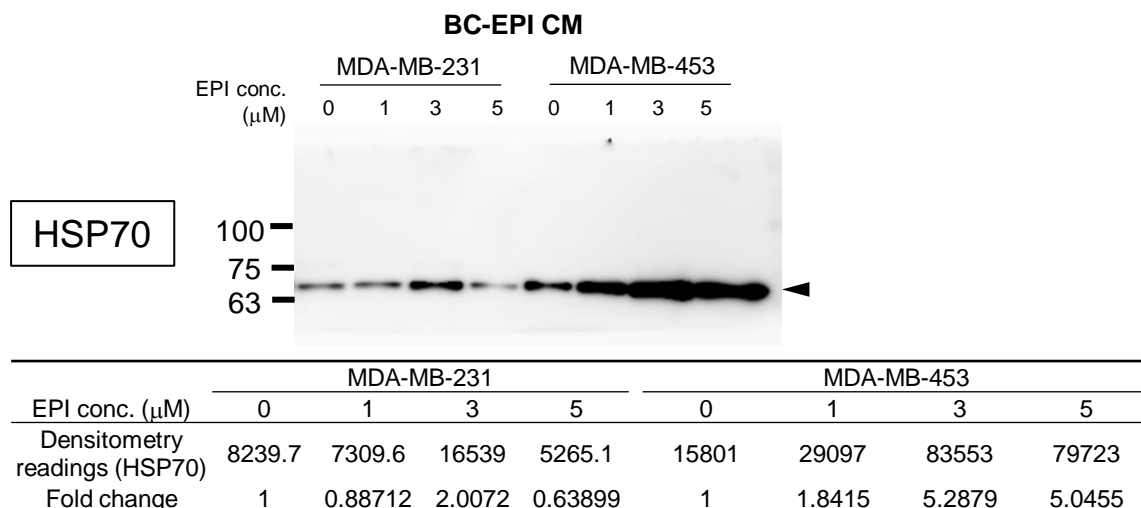

B

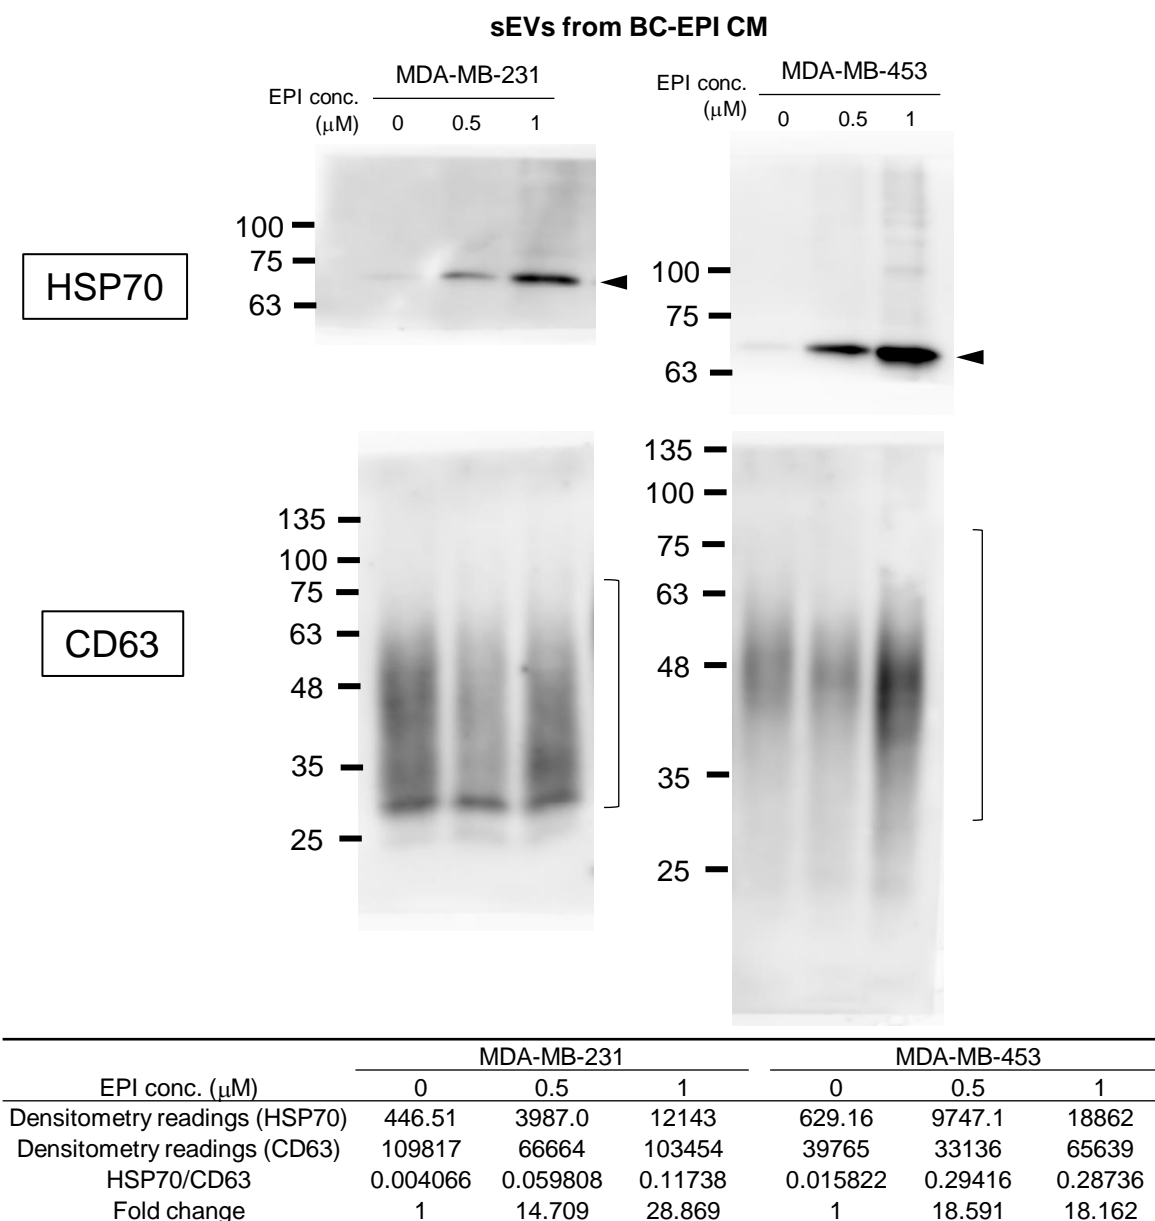

**Supplemental materials; The whole blot and densitometry readings/intensity ratio of each band.** The whole western blot showing all bands and molecular weight markers and densitometry readings/intensity ratio of each band shown in Figure 2A (A), B (B), Figure 3B (C), F (D), and Figure S3A (E), S3B (F).

C

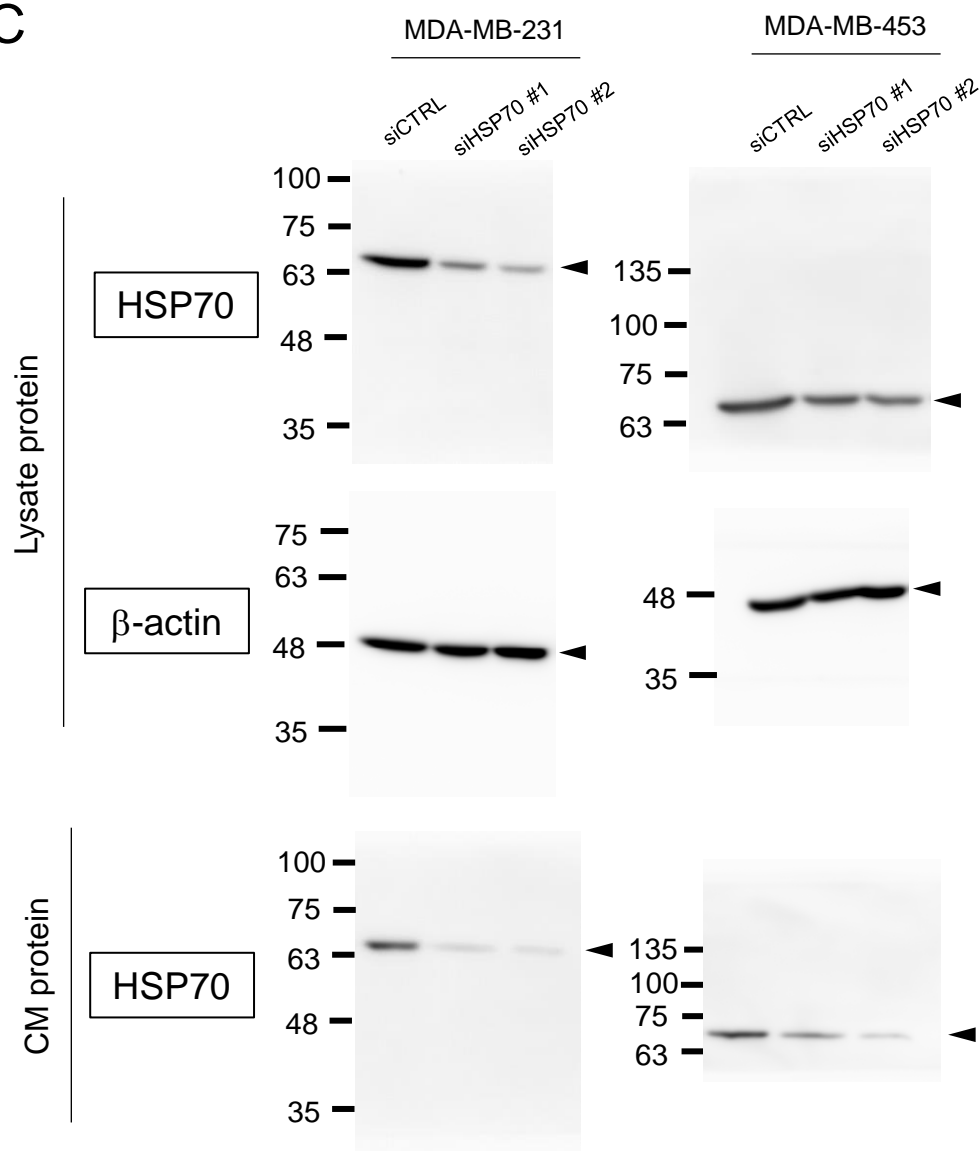

|        |                                         | MDA-MB-231 |           |           | MDA-MB-453 |           |           |
|--------|-----------------------------------------|------------|-----------|-----------|------------|-----------|-----------|
|        |                                         | siCTRL     | siHSP70#1 | siHSP70#2 | siCTRL     | siHSP70#1 | siHSP70#2 |
| Lysate | Densitometry readings (HSP70)           | 21219      | 6330.3    | 3747.0    | 18744      | 12259     | 9756.6    |
|        | Densitometry readings ( $\beta$ -actin) | 18777      | 19506     | 18515     | 23883      | 22840     | 26540     |
|        | HSP70/ $\beta$ -actin                   | 1.1301     | 0.32454   | 0.20238   | 0.78482    | 0.53671   | 0.36762   |
|        | Fold change                             | 1          | 0.28719   | 0.17909   | 1          | 0.68387   | 0.46841   |
| CM     | Densitometry readings (HSP70)           | 16274      | 2652.4    | 1486.1    | 15064      | 7213.5    | 1906.9    |
|        | Fold change                             | 1          | 0.16299   | 0.091322  | 1          | 0.47887   | 0.12659   |

D

BC-siHSP70 CM (80% v/v)

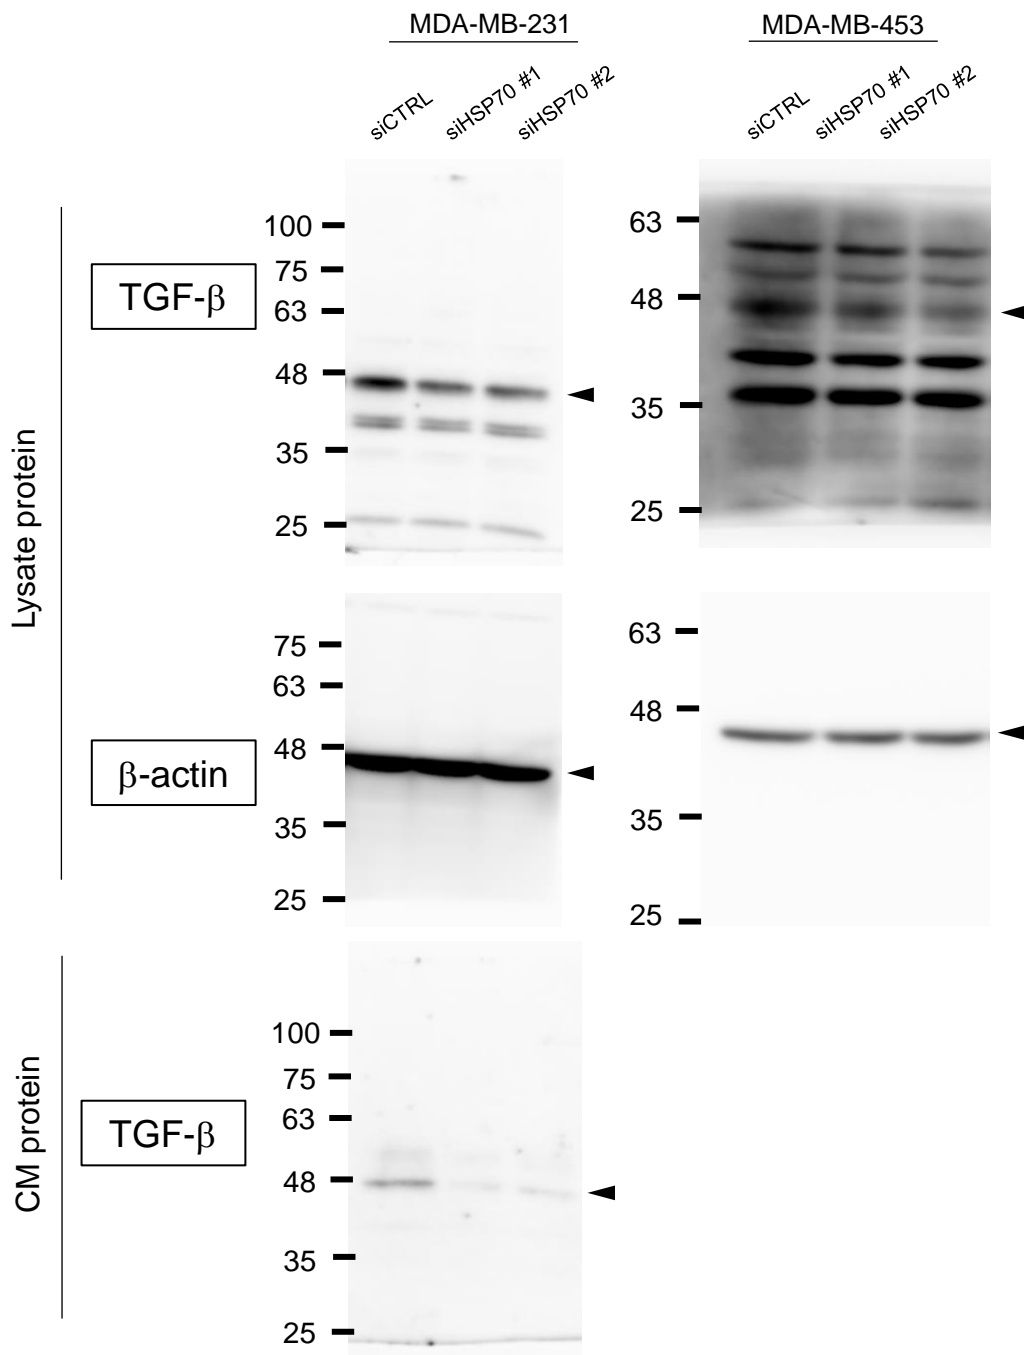

|        |                                 | MDA-MB-231 |           |           | MDA-MB-453 |           |           |
|--------|---------------------------------|------------|-----------|-----------|------------|-----------|-----------|
|        |                                 | siCTRL     | siHSP70#1 | siHSP70#2 | siCTRL     | siHSP70#1 | siHSP70#2 |
| Lysate | Densitometry readings (TGF-β)   | 12286      | 7852.8    | 7016.1    | 11345      | 8883.0    | 6122.9    |
|        | Densitometry readings (β-actin) | 24245      | 25484     | 27108     | 19831      | 19708     | 19934     |
|        | TGF-β/β-actin                   | 0.50674    | 0.30815   | 0.25882   | 0.57211    | 0.45074   | 0.30715   |
|        | Fold change                     | 1          | 0.60811   | 0.51076   | 1          | 0.78785   | 0.53688   |
| CM     | Densitometry readings (TGF-β)   | 9496.217   | 1236.134  | 1498.669  |            |           |           |
|        | Fold change                     | 1          | 0.13017   | 0.15782   |            |           |           |

**E**

**sEVs from BC-DTX CM**

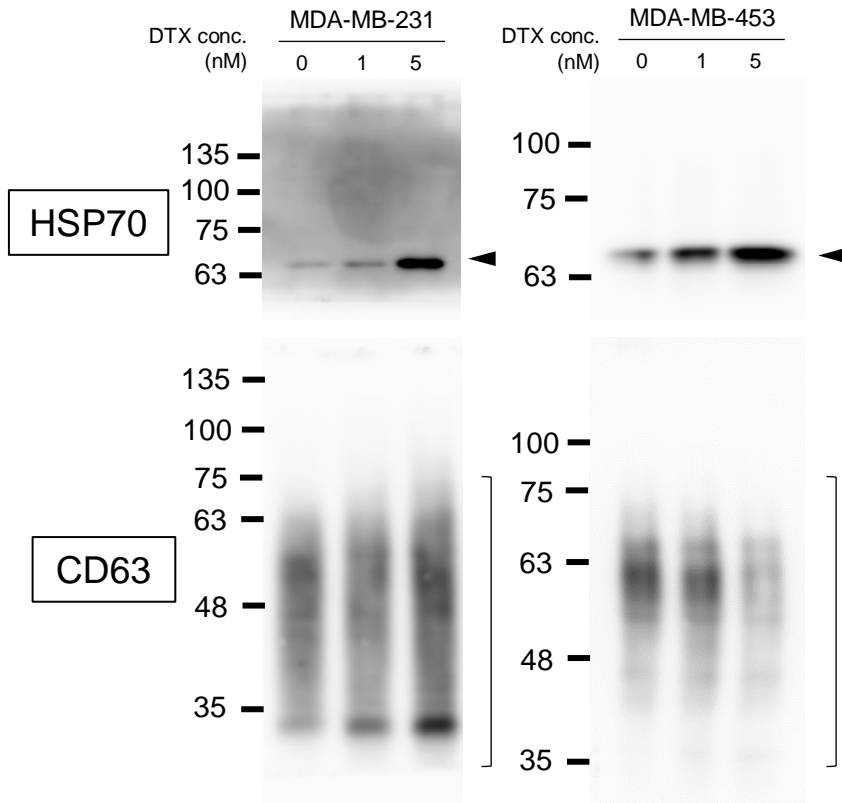

| DTX conc. (nM)                | MDA-MB-231 |          |         | MDA-MB-453 |         |         |
|-------------------------------|------------|----------|---------|------------|---------|---------|
|                               | 0          | 1        | 5       | 0          | 1       | 5       |
| Densitometry readings (HSP70) | 1499.6     | 3569.7   | 18632   | 6808.0     | 13816   | 21856   |
| Densitometry readings (CD63)  | 75375      | 70792    | 95833   | 71656      | 68864   | 36354   |
| HSP70/CD63                    | 0.019896   | 0.050427 | 0.19442 | 0.09501    | 0.20062 | 0.60119 |
| Fold change                   | 1          | 2.5346   | 9.7719  | 1          | 2.1116  | 6.3276  |

F

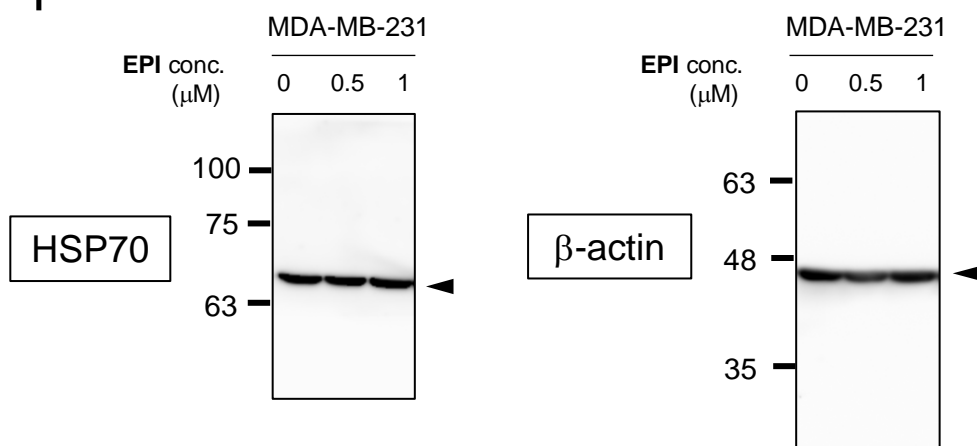

| EPI conc. ( $\mu$ M)                    | MDA-MB-231 |          |          |
|-----------------------------------------|------------|----------|----------|
|                                         | 0          | 0.5      | 1        |
| Densitometry readings (HSP70)           | 10200.761  | 9871.518 | 9995.347 |
| Densitometry readings ( $\beta$ -actin) | 12853.146  | 11000.78 | 11529.05 |
| HSP70/ $\beta$ -actin                   | 0.79363924 | 0.897347 | 0.86697  |
| Fold change                             | 1          | 1.130674 | 1.092398 |
